# Supplementary material for: Ion chromatography – nitrogen-sustained microwave inductively coupled atmospheric pressure plasma – mass spectrometry (IC-MICAP-MS) for arsenic speciation analysis in rice
Source: Royal Society of Chemistry journal article supplement (doi:10.1039/d3ja00400g), 2024-01-01
Supplement: d3ja00400g1.pdf [file d3ja00400g1.pdf]

## **Supporting Information:**

### **Ion chromatography – nitrogen-sustained microwave inductively coupled atmospheric pressure plasma – mass spectrometry (IC-MICAP-MS) for arsenic speciation analysis in rice.**

Shahnaz Mukta, Alexander Gundlach-Graham\*

Iowa State University, Department of Chemistry, Ames IA, 50011, USA

\*address correspondence to [alexgg@iastate.edu](mailto:alexgg@iastate.edu)

#### **List of Figures**

S1. Rice samples for arsenic speciation analysis

#### **List of Tables**

S1. MICAP-MS operation parameters for total arsenic analysis

S2.  $pK_a$  for arsenic species

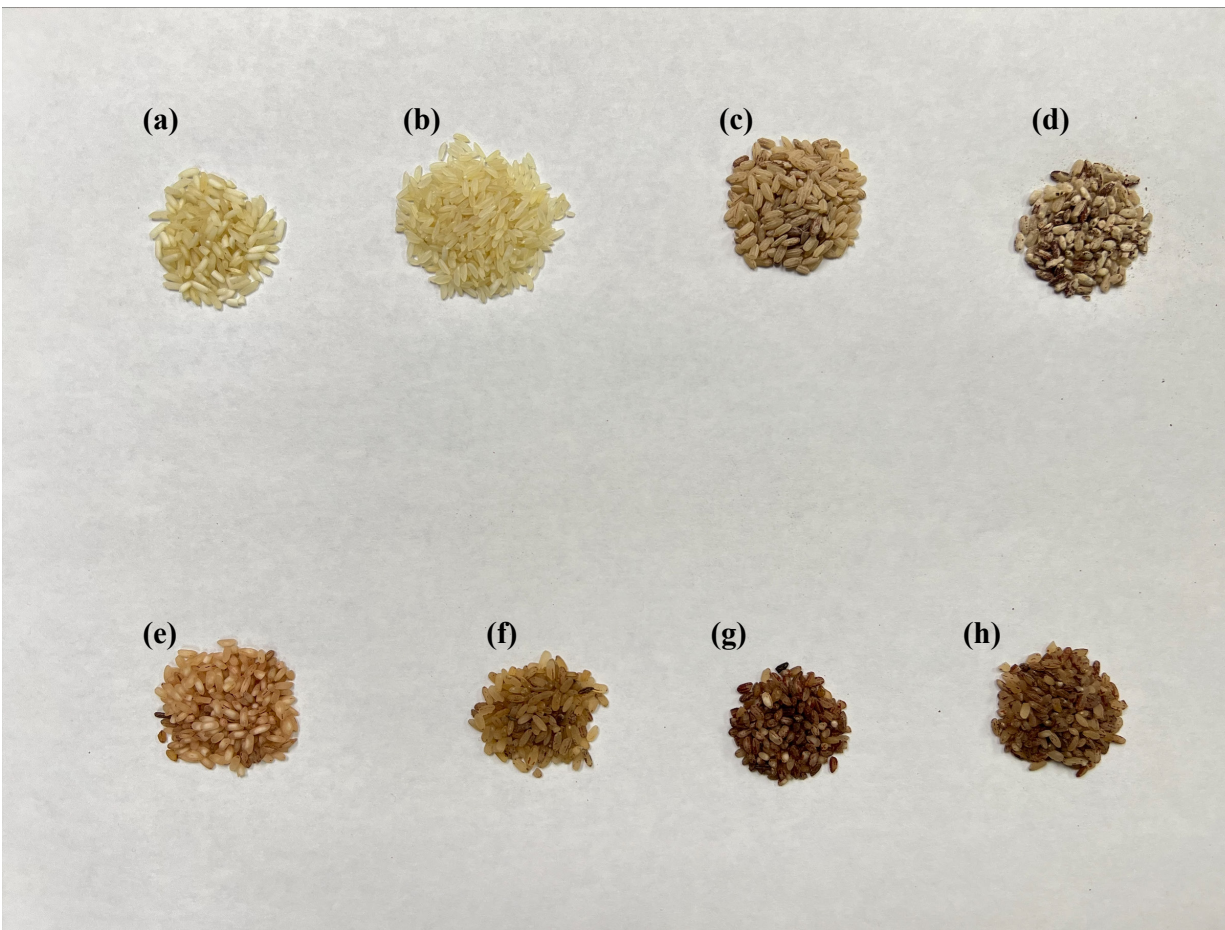

**Figure S1.** Varieties of rice samples analyzed for arsenic species via IC-MICAP-MS. (a) Kotok (b) Katari (c) Kala Manik (d) Hijol Digha (e) Bawla Digha (f) Maita Koral (g) Topa Bora (h) Chamara

|                                       |                                                  |
|---------------------------------------|--------------------------------------------------|
| Plasma flow (L min <sup>-1</sup> )    | 12.5                                             |
| Auxiliary flow (L min <sup>-1</sup> ) | 1.35                                             |
| Nebulizer flow (L min <sup>-1</sup> ) | 1.10                                             |
| Sheath flow (L min <sup>-1</sup> )    | 0.00                                             |
| Sampling depth (mm)                   | 5.0                                              |
| Plasma power (kW)                     | 1.50                                             |
| Pump rate (rpm)                       | 8.0                                              |
| Isotope measured                      | <sup>75</sup> As                                 |
| Ion optics                            | Optimized for highest <sup>75</sup> As intensity |

**Table S2.** pK<sub>a</sub> for arsenic species, where K<sub>a</sub> is the acid dissociation constant

| Arsenic Species | Formula                                         | pK <sub>a</sub>   |
|-----------------|-------------------------------------------------|-------------------|
| As(III)         | OAs(OH)                                         | 9.23, 12.13, 13.4 |
| DMA             | (CH <sub>3</sub> ) <sub>2</sub> AsO(OH)         | 6.2               |
| MMA             | (CH <sub>3</sub> )AsO(OH) <sub>2</sub>          | 4.1, 8.7          |
| As(V)           | OAs(OH) <sub>3</sub>                            | 2.19, 6.98, 11.53 |
| AsB             | C <sub>5</sub> H <sub>11</sub> AsO <sub>2</sub> | 2.18              |
